# Supplementary material
Source: PubMed Central journal article supplement (PMC2700183)

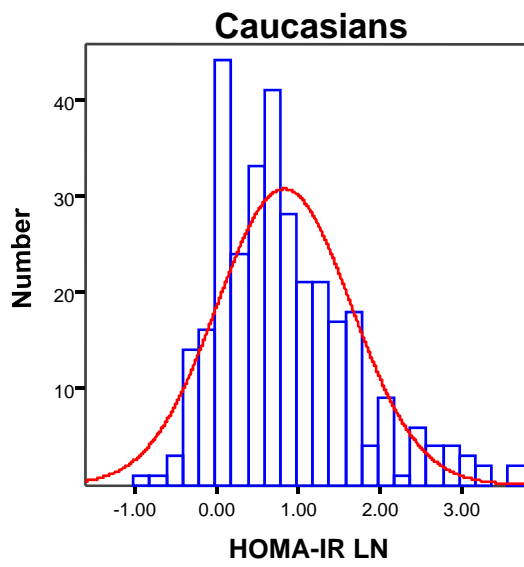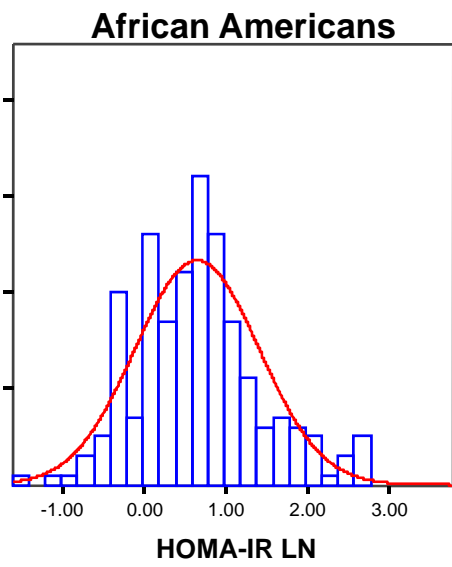

Supplement: NIHMS81703-supplement-01.pdf [file NIHMS81703-supplement-01.pdf]
